# Supplementary material for: Trends in Tuberculosis-Related Mortality in the United States, 1999 to 2022: A Nationwide Analysis based on Sex, Race, Age, Region, &amp; Locality
Source: Research Square preprint supplement (doi:10.21203/rs.3.rs-6969006/v1), 2025-07-14

**Supplemental Table 1.** TB-related Mortality Trends, Overall and Stratified by Sex, 1999 to 2022.

|  | Age-Adjusted Mortality Rate (per 100,000) | | |
| --- | --- | --- | --- |
| Year | Overall | Female | Male |
| 1999 | 1.24 | 0.77 | 1.94 |
| 2000 | 1 | 0.67 | 1.55 |
| 2001 | 0.95 | 0.65 | 1.44 |
| 2002 | 0.89 | 0.62 | 1.38 |
| 2003 | 0.86 | 0.58 | 1.27 |
| 2004 | 0.74 | 0.52 | 1.14 |
| 2005 | 0.74 | 0.52 | 1.11 |
| 2006 | 0.69 | 0.44 | 1.08 |
| 2007 | 0.61 | 0.4 | 0.9 |
| 2008 | 0.6 | 0.43 | 0.95 |
| 2009 | 0.55 | 0.39 | 0.81 |
| 2010 | 0.54 | 0.37 | 0.82 |
| 2011 | 0.5 | 0.39 | 0.71 |
| 2012 | 0.49 | 0.39 | 0.74 |
| 2013 | 0.48 | 0.32 | 0.76 |
| 2014 | 0.45 | 0.29 | 0.71 |
| 2015 | 0.42 | 0.28 | 0.69 |
| 2016 | 0.44 | 0.31 | 0.68 |
| 2017 | 0.44 | 0.28 | 0.65 |
| 2018 | 0.44 | 0.31 | 0.74 |
| 2019 | 0.44 | 0.31 | 0.65 |
| 2020 | 0.47 | 0.34 | 0.74 |
| 2021 | 0.52 | 0.36 | 0.79 |
| 2022 | 0.45 | 0.34 | 0.7 |
| **Number of Joinpoints (Years of Joinpoint)** | **2 (2001, 2014)** | **3 (2007, 2012, 2015)** | **1 (2011)** |
| **APC Segment-1 (95% CI)** | -13.28* (-16.37 to –6.31) | -7.08* (-12.19 to –1.03) | -7.17* (-8.83 to –6.08) |
| **APC Segment-2 (95% CI)** | -5.59* (-6.62 to –1.68) | -2.47 (-9.39 to 2.52) | 0.03 (-1.49 to 2.77) |
| **APC Segment-3 (95% CI)** | 1.35 (-0.76 to 7.11) | -9.42 (-13.74 to 6.36) |  |
| **APC Segment-4 (95% CI)** |  | 3.69 (-5.34 to 12.63) |  |
| **Average APC (AAPC) (95% CI)** | -3.95* (-4.44 to –3.39) | -3.23* (-3.95 to –2.67) | -3.79* (-4.36 to –3.26) |

**Supplemental Figure 1.** Multiple Joinpoint Model TB-related Deaths by Sex. Overall and gender stratified data regarding mortality rates related to TB between 1999 and 2022.


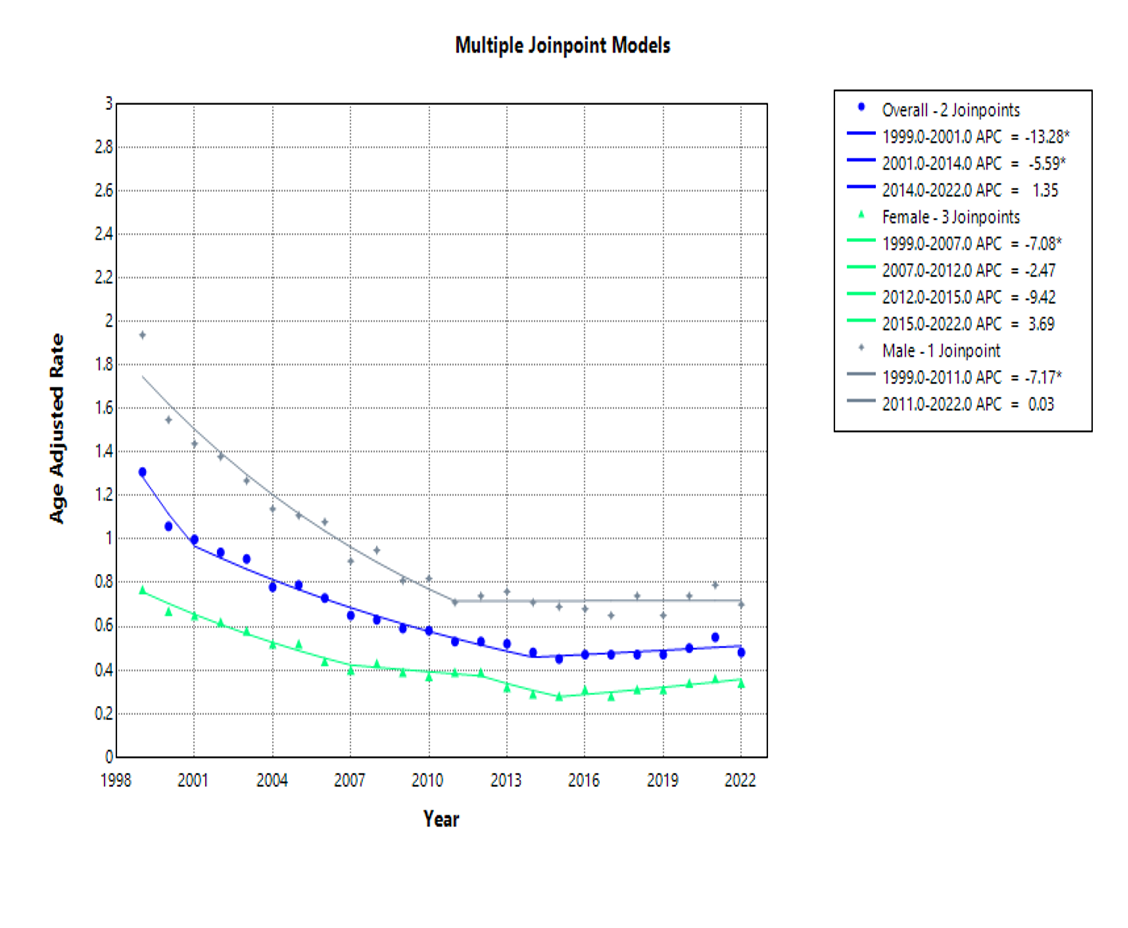
**Supplemental Table 2.** TB-related Mortality Trends Stratified by Race, 1999 to 2022.

|  | Age-Adjusted Mortality Rate (per 100,000) | | | |
| --- | --- | --- | --- | --- |
| Year | Asian or Pacific Islander | Black or African American | White | Hispanic or Latino |
| 1999 | 5.35 | 3.62 | 0.78 | 2.71 |
| 2000 | 4.43 | 3.09 | 0.64 | 1.86 |
| 2001 | 3.73 | 2.66 | 0.66 | 1.9 |
| 2002 | 3.51 | 2.58 | 0.6 | 1.67 |
| 2003 | 3.37 | 2.19 | 0.54 | 1.5 |
| 2004 | 2.54 | 2.1 | 0.49 | 1.61 |
| 2005 | 3.53 | 1.88 | 0.46 | 1.5 |
| 2006 | 3.2 | 1.79 | 0.44 | 1.5 |
| 2007 | 2.45 | 1.48 | 0.36 | 1.19 |
| 2008 | 3.05 | 1.52 | 0.37 | 1.21 |
| 2009 | 2.55 | 1.22 | 0.32 | 1 |
| 2010 | 2.44 | 1.1 | 0.32 | 1.08 |
| 2011 | 2.51 | 1.13 | 0.31 | 1.02 |
| 2012 | 2.02 | 0.88 | 0.31 | 0.98 |
| 2013 | 2.09 | 0.91 | 0.3 | 0.79 |
| 2014 | 1.97 | 0.9 | 0.27 | 0.72 |
| 2015 | 2.07 | 0.68 | 0.25 | 0.71 |
| 2016 | 1.89 | 0.94 | 0.25 | 0.81 |
| 2017 | 2.01 | 0.67 | 0.27 | 0.85 |
| 2018 | 1.82 | 0.83 | 0.29 | 0.83 |
| 2019 | 2.12 | 0.7 | 0.3 | 0.61 |
| 2020 | 1.96 | 0.83 | 0.3 | 0.89 |
| 2021 | 2.27 | 0.87 | 0.37 | 0.77 |
| 2022 | 2.06 | 0.89 | 0.28 | 0.65 |
| **Number of Joinpoints (Years of Joinpoint)** | **1 (2014)** | **1 (2015)** | **2 (2007, 2015)** | **1 (2014** |
| **APC Segment-1 (95% CI)** | -5.47* (-8.32 to –4.15) | -9.11* (-10.50 to –8.21) | -8.01* (-13.32 to –6.21) | -6.79* (-11.87 to –5.40) |
| **APC Segment-2 (95% CI)** | 1.09 (-1.78 to 10.34) | 2.41 (-1.74 to 14.82) | -4.89 (-6.82 to 5.70) | -0.65 (-4.16 to 12.73) |
| **APC Segment-3 (95% CI)** |  |  | 2.48 (-1.05 to 11.54) |  |
| **Average APC (AAPC) (95% CI)** | -3.24* (-4.08 to –2.38) | -5.75* (-6.62 to –5.04) | -3.83* (-4.40 to –3.32) | -4.70* (-5.78 to –3.79) |

**Supplemental Figure 2**. Multiple Joinpoint Model TB-related Deaths by Race. Race-stratified data regarding mortality rates related to TB between 1999 and 2022.


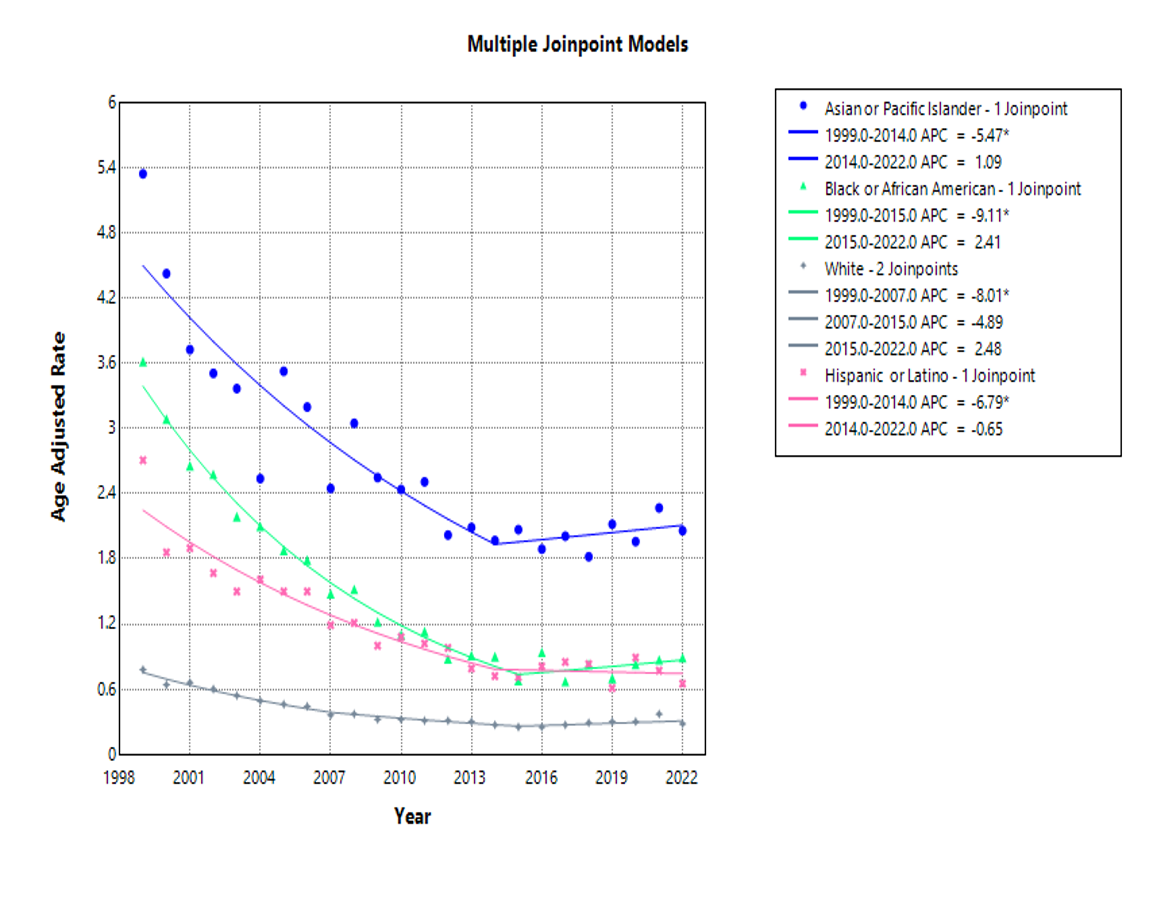
**Supplemental Table 3.** TB-related Mortality Trends Stratified by Age, 1999 to 2022.

|  | Age-Adjusted Mortality Rate (per 100,000) | | | | | |
| --- | --- | --- | --- | --- | --- | --- |
| Year | 35-44 years | 45-54 years | 55-64 years | 65-74 years | 75-84 years | 85+ years |
| 1999 | 0.29 | 0.55 | 1.06 | 2 | 4.07 | 8.11 |
| 2000 | 0.21 | 0.49 | 0.78 | 1.61 | 3.85 | 5.76 |
| 2001 | 0.2 | 0.4 | 0.86 | 1.63 | 3.45 | 5.66 |
| 2002 | 0.21 | 0.39 | 0.74 | 1.59 | 3.21 | 5.38 |
| 2003 | 0.16 | 0.45 | 0.71 | 1.26 | 3.23 | 4.7 |
| 2004 | 0.2 | 0.35 | 0.58 | 1.33 | 2.46 | 4.86 |
| 2005 | 0.17 | 0.38 | 0.59 | 1.21 | 2.55 | 4.67 |
| 2006 | 0.12 | 0.39 | 0.57 | 1.12 | 2.54 | 4.27 |
| 2007 | 0.15 | 0.31 | 0.46 | 0.94 | 2.25 | 3.33 |
| 2008 | 0.13 | 0.32 | 0.5 | 1.03 | 2.12 | 4.14 |
| 2009 | 0.09 | 0.26 | 0.47 | 0.83 | 2.18 | 3.24 |
| 2010 | 0.1 | 0.25 | 0.54 | 0.9 | 1.77 | 3.51 |
| 2011 | 0.1 | 0.24 | 0.53 | 0.81 | 1.93 | 3.12 |
| 2012 | 0.07 | 0.27 | 0.48 | 0.74 | 1.74 | 3.09 |
| 2013 | 0.11 | 0.21 | 0.47 | 0.82 | 1.61 | 3.39 |
| 2014 | 0.08 | 0.2 | 0.47 | 0.67 | 1.55 | 2.99 |
| 2015 | 0.09 | 0.24 | 0.39 | 0.69 | 1.38 | 2.83 |
| 2016 | 0.11 | 0.22 | 0.5 | 0.71 | 1.42 | 2.79 |
| 2017 | 0.07 | 0.18 | 0.44 | 0.78 | 1.5 | 2.77 |
| 2018 | 0.11 | 0.21 | 0.44 | 0.72 | 1.61 | 2.78 |
| 2019 | 0.09 | 0.16 | 0.43 | 0.79 | 1.45 | 2.73 |
| 2020 | 0.12 | 0.25 | 0.54 | 0.88 | 1.51 | 2.78 |
| 2021 | 0.14 | 0.28 | 0.54 | 0.96 | 1.59 | 2.79 |
| 2022 | 0.12 | 0.22 | 0.57 | 0.84 | 1.39 | 2.34 |
| **Number of Joinpoints (Years of Joinpoint)** | 1 (2012) | 1 (2017) | 2 (2007, 2019) | 1 (2014) | 1 (2014) | 2 (2001, 2011) |
| **APC Segment-1 (95% CI)** | -8.84* (-13.87 to -6.33) | -5.30* (-11.01 to -3.67) | -7.94* (-13.12 to -5.49) | -6.58* (-7.63 to -5.81) | -6.35* (-7.53 to -5.63) | -15.97* (-20.83 to -6.48) |
| **APC Segment-2 (95% CI)** | 4.00 (-0.95 to 18.73) | 5.86 (-4.01 to 29.23) | -0.93 (-6.32 to 0.66) | 4.18* (2.07 to 7.55) | 0.17 (-2.18 to 5.06) | -5.23 (-7.51 to 0.49 |
| **APC Segment-3 (95% CI)** | -- | -- | 9.59* (0.78 to 21.35) | -- | -- | -2.04 (-8.97 to 5.12) |
| **Average APC (AAPC) (95% CI)** | -3.46* (-5.11 to -1.98) | - 2.98* (-4.81 to -1.86) | -2.14* (-3.02 to -1.46) |  | -4.13* (-4.73 to -3.63) | -4.72* (-5.29 to -3.95) |

**Supplemental Figure 3**. Multiple Joinpoint Model TB-related Deaths by Age. Age-stratified data regarding mortality rates related to TB between 1999 and 2022.


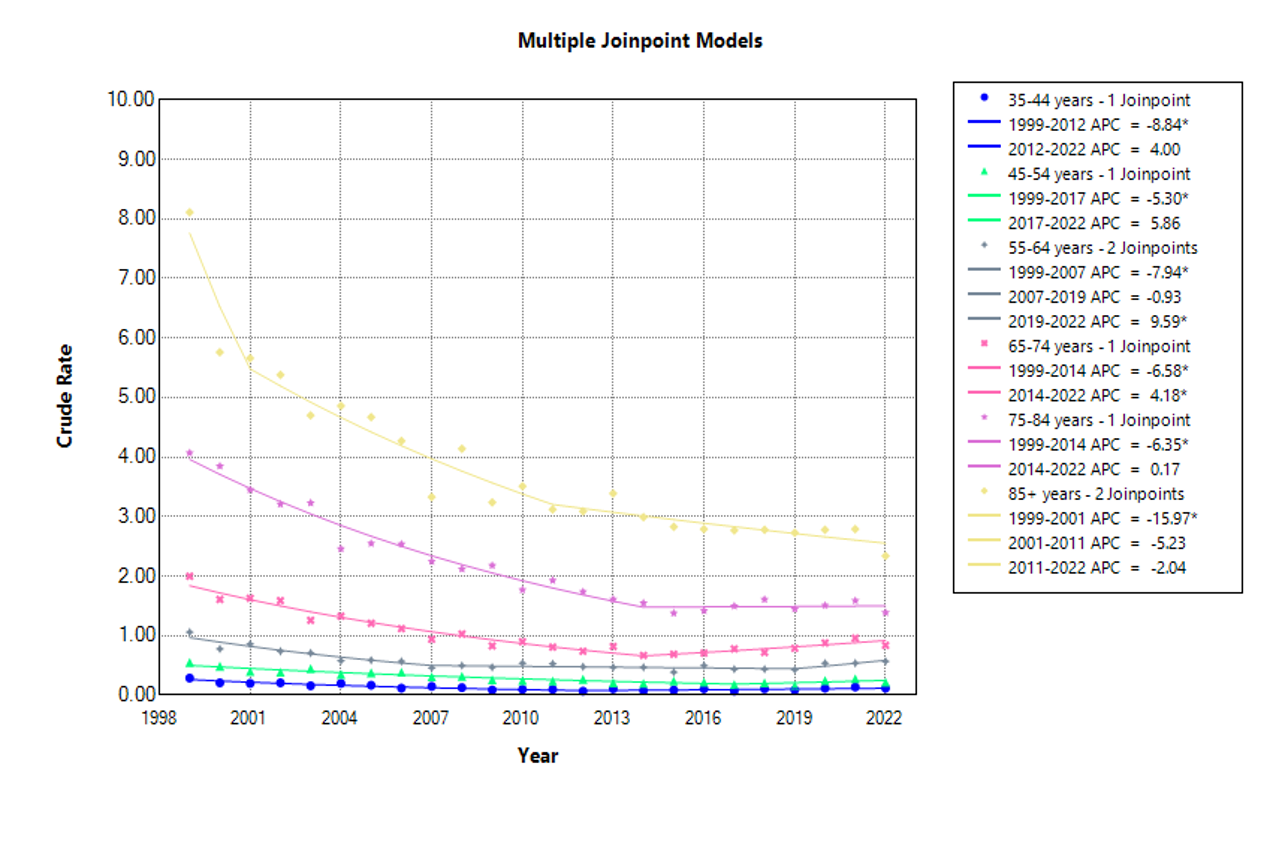


**Supplemental Table 4.** TB-related Mortality Trends Stratified by Region, 1999 to 2022.

|  | Age-Adjusted Mortality Rate (per 100,000) | | | |
| --- | --- | --- | --- | --- |
| Year | Northeast | Midwest | South | West |
| 1999 | 1.06 | 0.96 | 1.47 | 1.56 |
| 2000 | 0.9 | 0.86 | 1.24 | 1.16 |
| 2001 | 0.79 | 0.7 | 1.22 | 1.17 |
| 2002 | 0.75 | 0.67 | 1.12 | 1.18 |
| 2003 | 0.73 | 0.69 | 0.96 | 1.1 |
| 2004 | 0.57 | 0.53 | 0.95 | 1.01 |
| 2005 | 0.53 | 0.56 | 0.87 | 1.1 |
| 2006 | 0.51 | 0.49 | 0.78 | 1.12 |
| 2007 | 0.42 | 0.48 | 0.7 | 0.88 |
| 2008 | 0.53 | 0.44 | 0.69 | 0.94 |
| 2009 | 0.51 | 0.4 | 0.6 | 0.72 |
| 2010 | 0.46 | 0.39 | 0.6 | 0.8 |
| 2011 | 0.45 | 0.4 | 0.56 | 0.81 |
| 2012 | 0.37 | 0.34 | 0.55 | 0.7 |
| 2013 | 0.37 | 0.33 | 0.5 | 0.81 |
| 2014 | 0.36 | 0.42 | 0.47 | 0.66 |
| 2015 | 0.4 | 0.29 | 0.46 | 0.65 |
| 2016 | 0.4 | 0.3 | 0.47 | 0.68 |
| 2017 | 0.41 | 0.36 | 0.43 | 0.62 |
| 2018 | 0.37 | 0.43 | 0.53 | 0.65 |
| 2019 | 0.45 | 0.3 | 0.49 | 0.58 |
| 2020 | 0.47 | 0.35 | 0.54 | 0.68 |
| 2021 | 0.39 | 0.48 | 0.57 | 0.73 |
| 2022 | 0.46 | 0.37 | 0.46 | 0.65 |
| **Number of Joinpoints (Years of Joinpoint)** | 2 (2005, 2014) | 1 (2012) | 3 (2009, 2017, 2020) | 1 (2015) |
| **APC Segment-1 (95% CI)** | -10.19* (-17.24 to -6.92) | -7.31* (-10.73 to -5.62) | -8.10* (-11.14 to -6.72) | -4.60* (-7.65 to -3.71) |
| **APC Segment-2 (95% CI)** | -4.00 (-7.79 to 0.58) | 2.17 (-0.86 to 11.09) | -4.09* (-9.00 to -0.43) | -3.04* (-3.91 to -2.30) |
| **APC Segment-3 (95% CI)** | 2.24 (-0.67 to 11.68) | -- | 9.14 (-4.49 to 13.28) | -- |
| **APC Segment-4 (95% CI)** | -- | -- | -8.62 (-15.09 to 2.39) | -- |
| **Average APC (AAPC) (95% CI)** | -3.56* (-4.23 to -2.93) | -3.30* (-4.35 to -2.353) | -4.66* (-5.23 to -4.19) | -3.04* (-3.91 to -2.29) |

**Supplemental Figure 4**. Multiple Joinpoint Model TB-related Deaths by Region. Region-stratified data regarding mortality rates related to TB between 1999 and 2022.


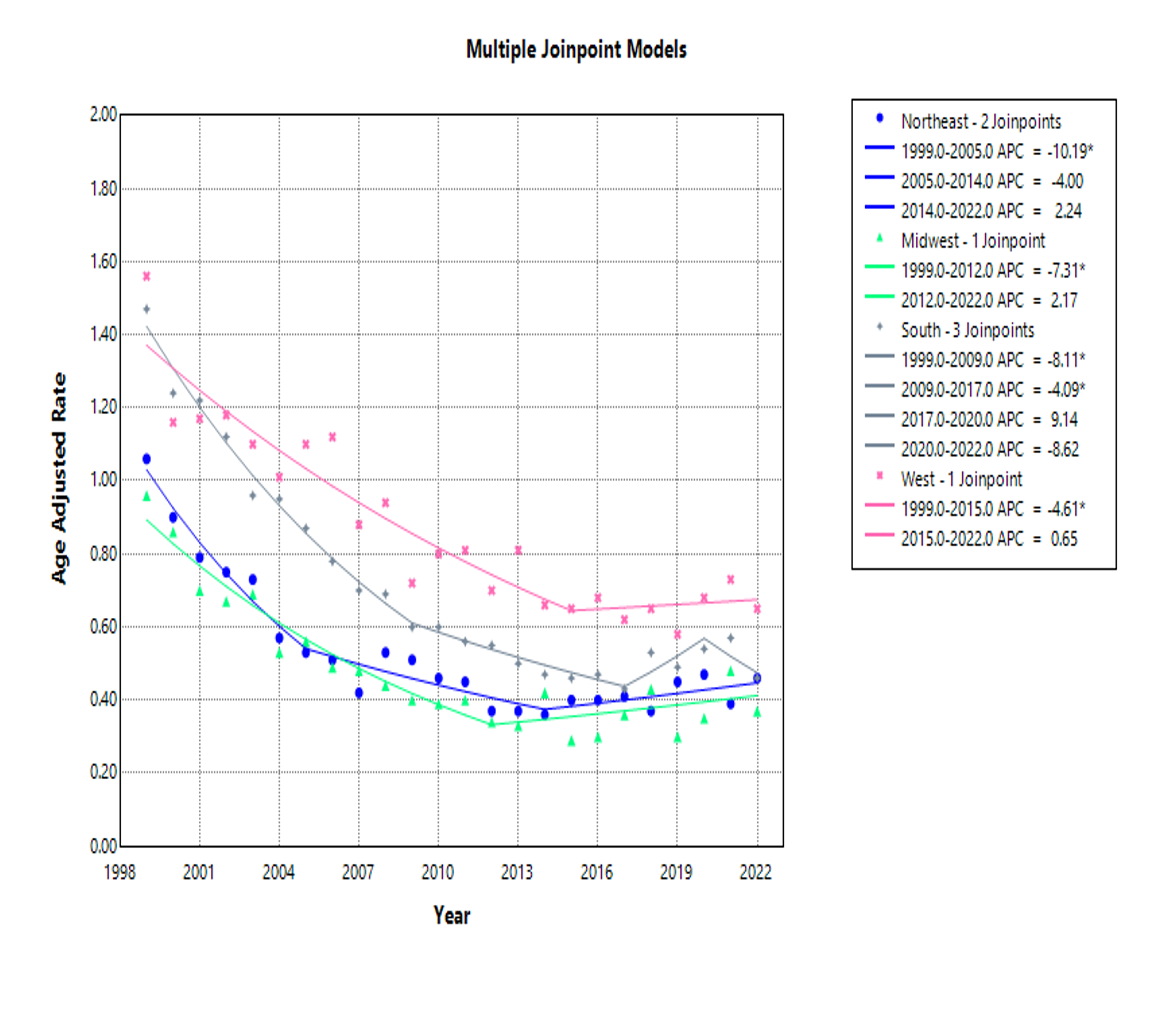


**Supplemental Table 5.** TB-related Mortality Trends Stratified by Urban or Rural location, 1999 to 2020.

|  | Age-Adjusted Mortality Rate (per 100,000) | |
| --- | --- | --- |
| Year | Urban | Rural |
| 1999 | 1.31 | 1.09 |
| 2000 | 1.05 | 0.94 |
| 2001 | 1.02 | 0.92 |
| 2002 | 0.93 | 1 |
| 2003 | 0.93 | 0.72 |
| 2004 | 0.82 | 0.65 |
| 2005 | 0.82 | 0.6 |
| 2006 | 0.75 | 0.6 |
| 2007 | 0.62 | 0.61 |
| 2008 | 0.66 | 0.55 |
| 2009 | 0.62 | 0.43 |
| 2010 | 0.56 | 0.53 |
| 2011 | 0.56 | 0.48 |
| 2012 | 0.54 | 0.46 |
| 2013 | 0.53 | 0.43 |
| 2014 | 0.49 | 0.45 |
| 2015 | 0.45 | 0.38 |
| 2016 | 0.48 | 0.43 |
| 2017 | 0.48 | 0.4 |
| 2018 | 0.48 | 0.48 |
| 2019 | 0.47 | 0.35 |
| 2020 | 0.51 | 0.47 |
| **Number of Joinpoints (Years of Joinpoint)** | 2 (2001, 2015) | 1 (2009) |
| **APC Segment-1 (95% CI)** | -12.65* (-15.74 to -6.20) | -7.79* (-15.78 to -5.74) |
| **APC Segment-2 (95% CI)** | -5.39* (-6.33 to -3.44) | -1.51 (-3.92 to 8.45) |
| **APC Segment-3 (95% CI)** | 2.16 (-1.44 to 12.11) | -- |
| **Average APC (AAPC) (95% CI)** | -4.37* (-4.92 to -3.78) | -4.55* (-5.65 to -3.53) |

**Supplemental Figure 5**. Multiple Joinpoint Model TB-related Deaths by Urban vs Rural area. Urban vs. rural-stratified data regarding mortality rates related to TB between 1999 and 2020.


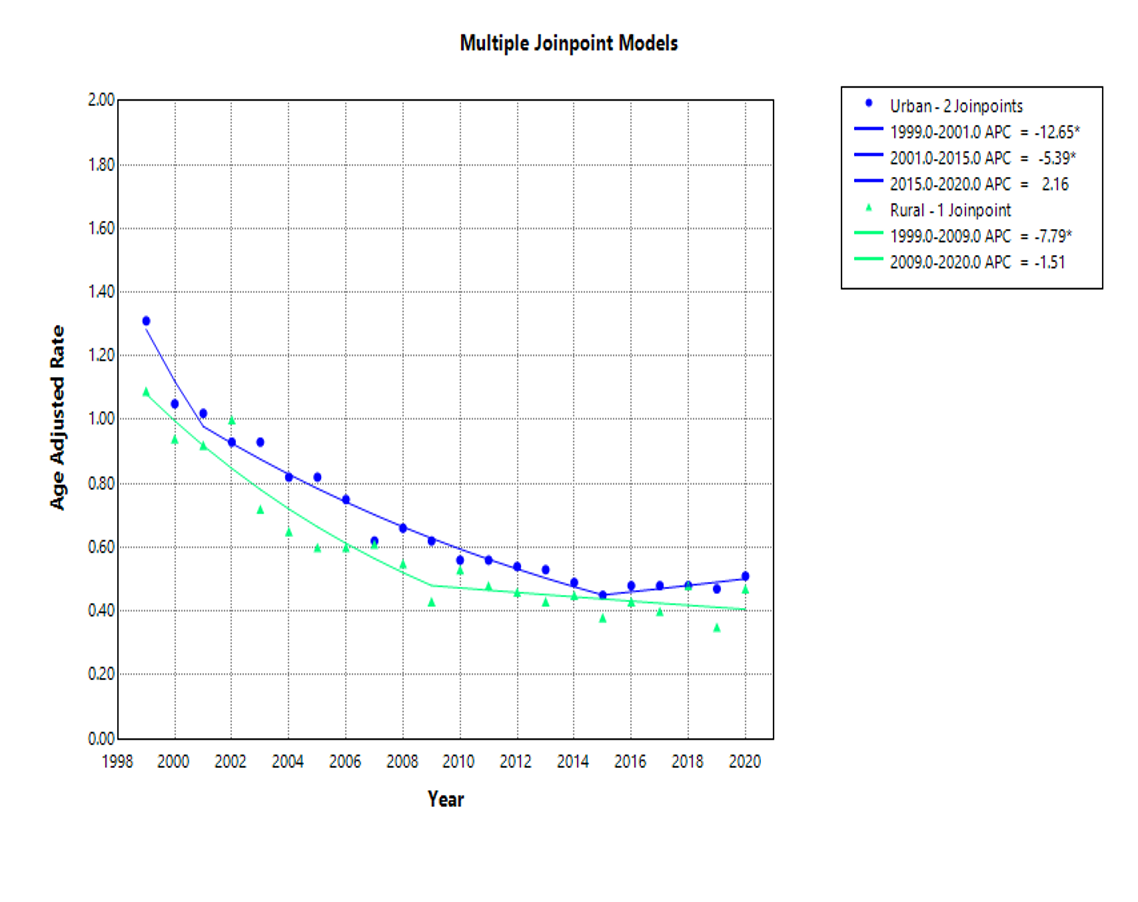

Supplement: Supplementary file 1 [file 492e1366b00dd8ac4dabe701.docx]
